# Supplementary material
Source: PubMed Central journal article supplement (PMC3411984)
Supplement: 0913334108_pnas.200913334SI.pdf [file 0913334108_pnas.200913334SI.pdf]

# Supporting Information

Webb and Block 10.1073/pnas.0913334108

**Table S1. Country/year observations included in anthropometric regressions (n = 77)**

| Africa        |                        | Asia       |                                    | Latin America      |                         |
|---------------|------------------------|------------|------------------------------------|--------------------|-------------------------|
| Country       | Years                  | Country    | Years                              | Country            | Years                   |
| Benin         | 1996, 2001             | Bangladesh | 1996, 1999, 2004                   | Brazil             | 1986, 1996              |
| Burkina Faso  | 1992, 1998, 2003       | Egypt      | 1988, 1992, 1995, 2000, 2003, 2005 | Colombia           | 1986, 1995, 2000, 2004  |
| Cameroon      | 1991, 1998, 2004       | India      | 1992, 1998, 2005                   | Dominican Republic | 1986, 1991, 1996, 2002, |
| Chad          | 1996, 2004             | Pakistan   | 1990                               | Nicaragua          | 1997, 2001              |
| Cote d'Ivoire | 1994, 1998             | Sri Lanka  | 1987                               |                    |                         |
| Ethiopia      | 1992, 1997             | Thailand   | 1987                               |                    |                         |
| Ghana         | 1988, 1993, 1998, 2003 | Turkey     | 1993, 1998, 2003                   |                    |                         |
| Kenya         | 1993, 1998, 2003       |            |                                    |                    |                         |
| Madagascar    | 1992, 1997, 2003       |            |                                    |                    |                         |
| Mali          | 1987, 1995, 2001       |            |                                    |                    |                         |
| Mozambique    | 1997, 2003             |            |                                    |                    |                         |
| Nigeria       | 1990, 1999, 2003       |            |                                    |                    |                         |
| Senegal       | 1986, 1992, 2005       |            |                                    |                    |                         |
| Tanzania      | 1991, 1996, 1999, 2004 |            |                                    |                    |                         |
| Togo          | 1988, 1998             |            |                                    |                    |                         |
| Uganda        | 1988, 1995, 2000       |            |                                    |                    |                         |
| Zambia        | 1992, 1996, 2001       |            |                                    |                    |                         |

**Table S2. Descriptive statistics for variables used in statistical analysis**

| Variable                                     | Observations | Mean       | SD        | Minimum    | Maximum  |
|----------------------------------------------|--------------|------------|-----------|------------|----------|
| Wasting                                      | 81           | 10.11422   | 6.814893  | 1.2021     | 29.00307 |
| Obesity                                      | 81           | 18.26536   | 9.661714  | 3.366892   | 45.94229 |
| Stunting                                     | 81           | 36.92349   | 11.84345  | 13.13797   | 59.7398  |
| Log GDP per capita                           | 733          | 7.359705   | 0.7889029 | 5.762483   | 9.24669  |
| Rural population share                       | 780          | 65.29744   | 16.85554  | 15.8       | 92.5     |
| Agricultural share of GDP                    | 703          | 28.05893   | 12.49654  | 5.396275   | 72.02926 |
| RRA                                          | 599          | -0.2297242 | 0.2861943 | -0.9461988 | 1.29548  |
| Log agricultural income per capita           | 495          | 6.498293   | 0.688236  | 4.771035   | 8.185372 |
| Log nonagricultural income per capita        | 495          | 8.226108   | 0.6436788 | 6.861057   | 9.838702 |
| Mean wasting (1995–2005)                     | 26           | 18.46885   | 8.794553  | 4.811117   | 35.12907 |
| Mean wasting (1992–2002)                     | 26           | 18.20928   | 10.1559   | 5.250191   | 44.0873  |
| Years lost to noncommunicable disease (2002) | 30           | 22.9       | 18.64431  | 6          | 61       |
| Diabetes prevalence (2007)                   | 30           | 5.26       | 2.369868  | 2          | 11       |
